# Supplementary material for: Valve-Sparing Atrioventricular Valve Replacement in a Single-Ventricle Infant: Preserving the Entire Leaflet–Chordal Complex
Source: Research Square preprint supplement (doi:10.21203/rs.3.rs-6779580/v1), 2025-06-09
Supplement: Supplementary file 1 [file 92297f5e54b88e5a29c9b5d9.docx]

**Video legends**

**Video 1.** Preoperative echocardiography revealed a dilated systemic ventricle and a tethered common atrioventricular valve with inadequate coaptation, resulting in severe regurgitation.

**Video 2.** Operative video.

**Video 3.** Echocardiography following the bidirectional Glenn procedure demonstrated a well-functioning mechanical prosthesis without inflow or outflow tract obstruction. SV: systemic ventricle, SVOT systemic ventricular outflow tract, SA: single atrium.
